# Supplementary material for: Organization and distribution of glomeruli in the bowhead whale olfactory bulb
Source: PeerJ. 2015 Apr 28;3:e897. doi: 10.7717/peerj.897 (PMC4419441; doi:10.7717/peerj.897)
Supplement: Table S1 [file peerj-03-897-s007.xlsx]

## Sheet: table S1
Table S1. Number of glomeruli on approx. every 10th silde. Nos. of glomeruli with slide nos. in parentheses are extimated using the formula shown in the Materials and Methods section. No. of glomeruli in the slide no. 0 is 0.
slide no.	no. of glomeruli in a section
(10)	32
(20)	64
32	97
(42)	98
(52)	100
(62)	101
(72)	103
(82)	105
(92)	106
(102)	108
(112)	110
(122)	111
(132)	113
143	115
(153)	111
(163)	107
(173)	103
(183)	99
195	95
(205)	94
(215)	93
(225)	93
(235)	92
(245)	92
(255)	91
(265)	90
(275)	90
(285)	89
(295)	89
(305)	88
(315)	88
(325)	87
(335)	86
(345)	86
(355)	85
(365)	85
(375)	84
391	84
(401)	81
(411)	78
(421)	75
(431)	72
(441)	69
(451)	66
(461)	63
(471)	60
(481)	57
(491)	54
(501)	51
518	49
Total (50 slides)	4339
